# Supplementary material for: Transition Metal Complexes of Mixed Bioligands: Synthesis, Characterization, DFT Modeling, and Applications
Source: Hindawi journal article supplement (doi:10.1155/2019/3241061), 2019-05-23
Supplement: f1 [file 3241061.f1.pdf]

**A concise description of supplementary  
materials of paper entitled:**

**Transition Metal Complexes of Mixed Bioligands: Synthesis, Characterization, DFT  
Modeling and Applications**

Eman H. Ismail<sup>1</sup> and M. S. A. Abdel-Mottaleb <sup>2</sup>

<sup>1</sup>Analytical and Inorganic Chemistry Labs,

<sup>2</sup>Nano-Photochemistry, Solarchemistry and Computational Chemistry Labs,

Chemistry Department, Faculty of Science, Ain Shams University, 11566, Abbassia, Cairo, Egypt.

**The supplementary materials contain six figures and two tables to more clarify the structures and trends of the new preparing metal ternary complexes.**

**Figure Captions:**

**Figure 1S.** Infrared spectra of ligands (glutamic, arginine) and [Zn.Glu.Arg.(H<sub>2</sub>O)<sub>2</sub>].H<sub>2</sub>O.

**Fig 2S.** mass spectrum of Zn(II) complex

**Figure 3S.** The EPR spectrum of the Cu(II)-complex

**Figure 4S.** EPR Mulliken spin populations and Hyperfine (HF) coupling constants between Co(II)- and Cu(II)-ions bearing the unpaired electron and the surrounding O and N atoms of the chelates. HFC Values in MHz (1 MHz=0.00033356 cm<sup>-1</sup>).

**Figure 5S.** Some Photos of some microbial activity for the prepared complexes.

**Figure 6S.** The inhibition efficiency of aluminum specimens in aqueous solution of 1M HCl with different concentrations of mixed ligands (glu.and arg.)and their ternary metal complexes at 303K for 7 h.

• **Table Headings:**

**Table 1S.** MIP (molecular ion peak) values from mass spectra of the prepared complexes.

**Table 2S.** Cytotoxicity evaluation of the ligands and their complexes.

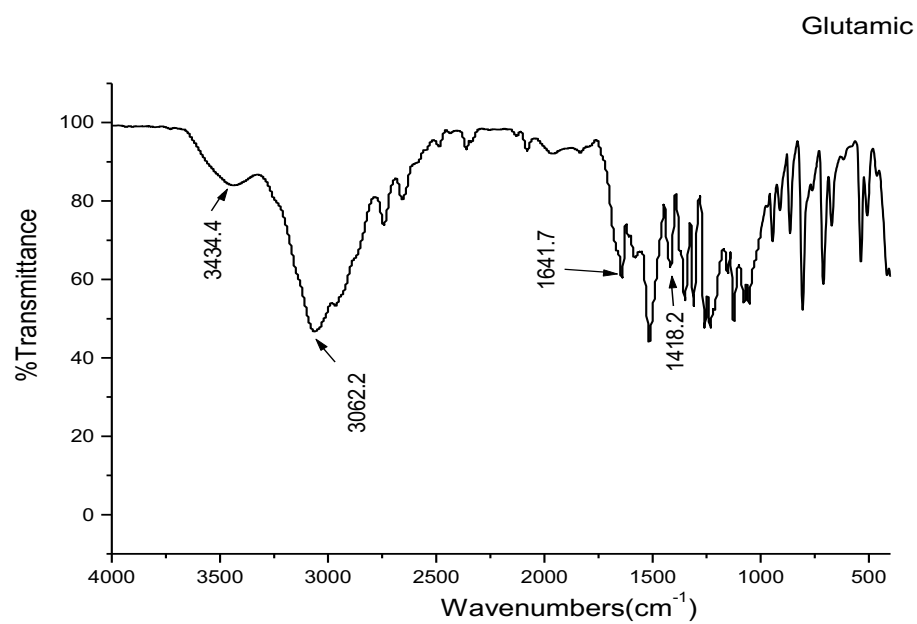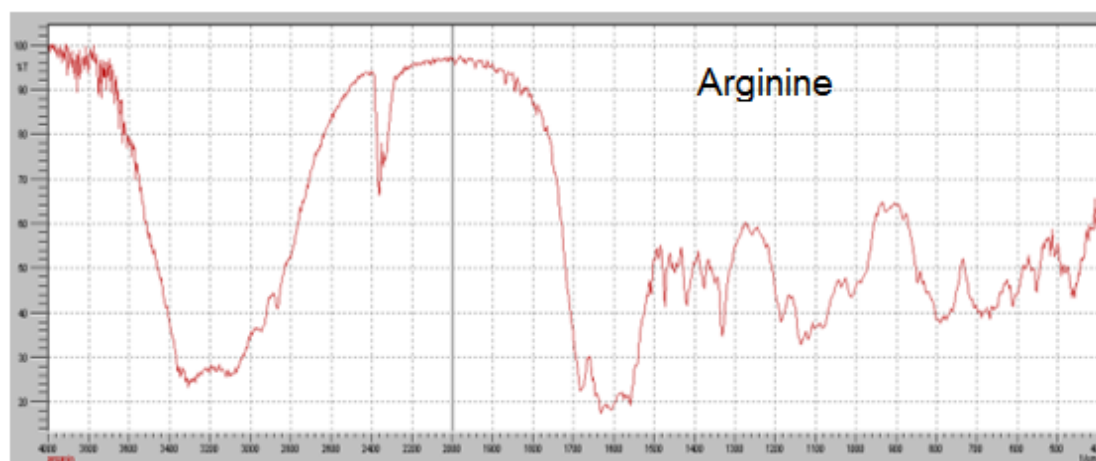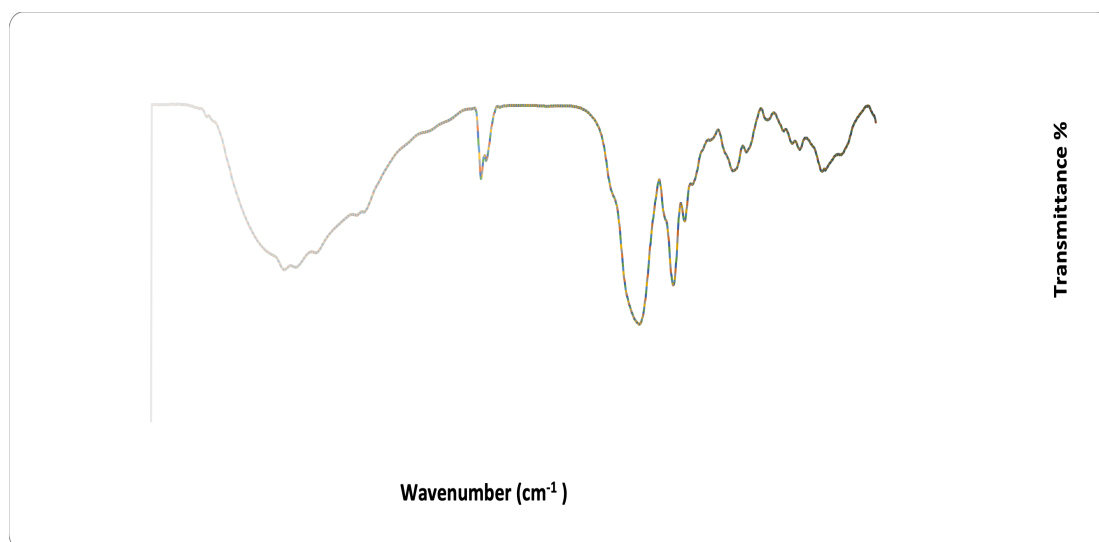

**Figure 1S** of Infrared spectra of glutamic, arginine and  $[\text{Zn.Glu.Arg.}(\text{H}_2\text{O})_2]\cdot\text{H}_2\text{O}$ .

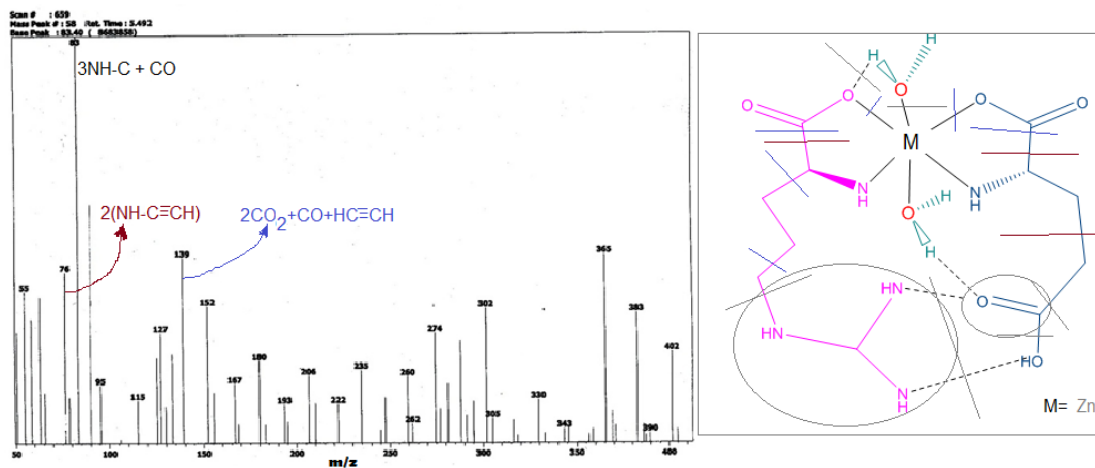

**Fig 2S** mass spectrum of Zn complex showing important fragments.

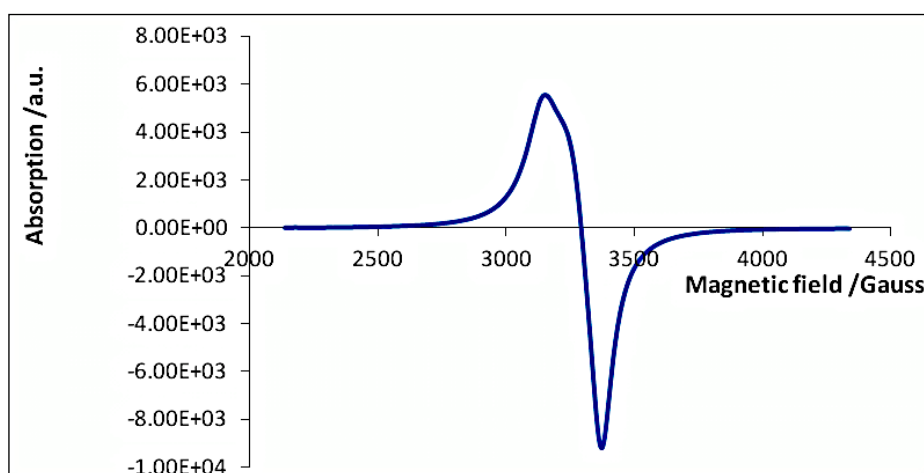

**Fig 3S** The EPR spectrum of the Cu(II)-complex (Similar spectrum is obtained in case of Co(II)-complex)

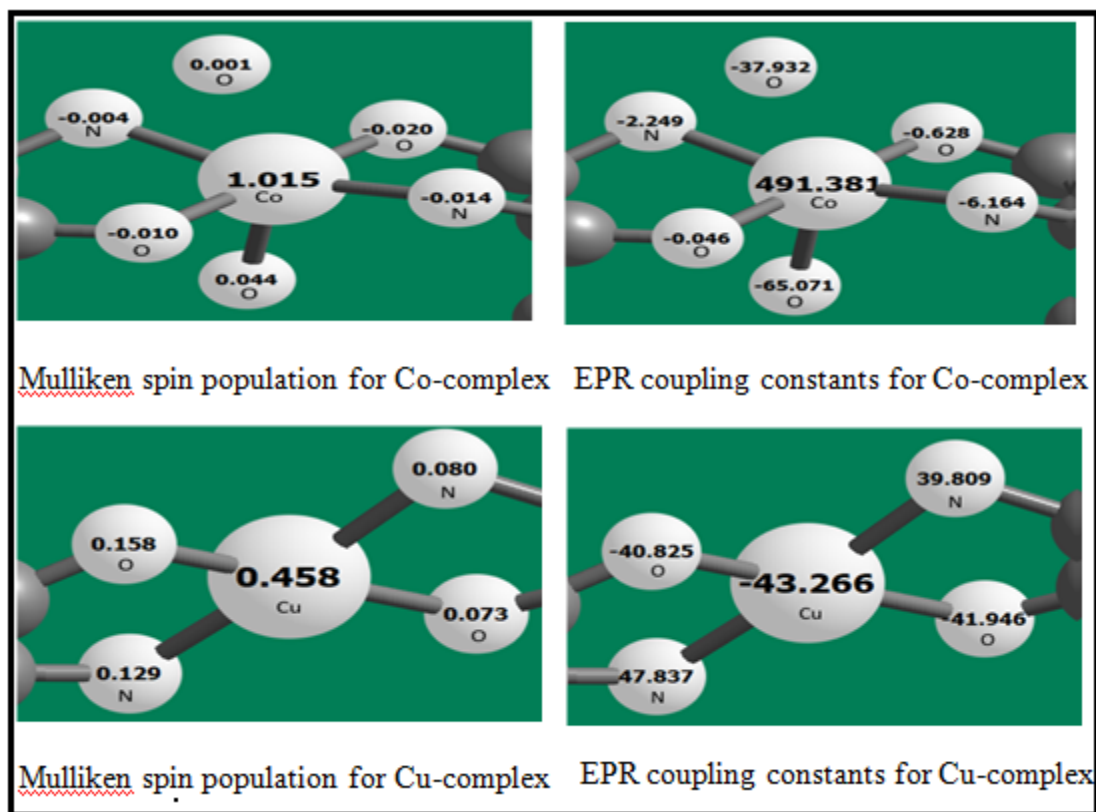

**Fig 4S** EPR Mulliken spin populations and Hyperfine (HF) coupling constants between Co(II)- and Cu(II)-ions bearing the unpaired electron and the surrounding O and N atoms of the chelates. HFC Values in MHz (1 MHz=0.00033356 cm<sup>-1</sup>)

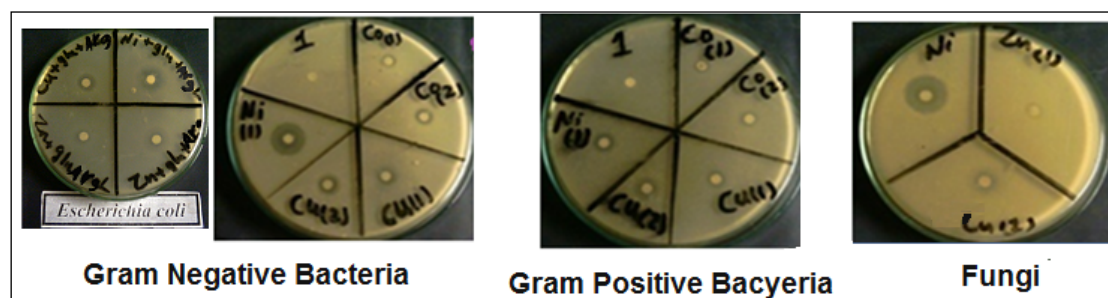

**Fig 5S** Some Photos of some microbial activity for the prepared complexes

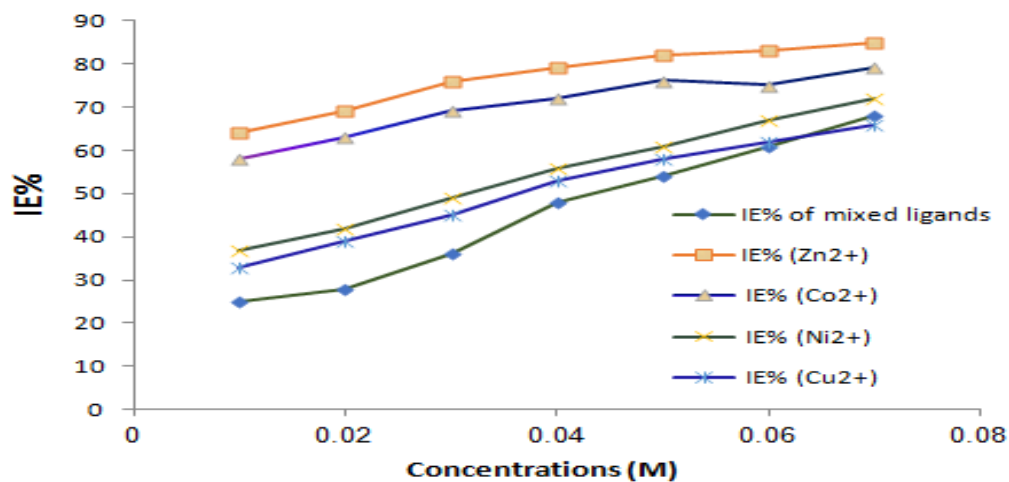

**Fig 6S** The inhibition efficiency of aluminum specimens in aqueous solution of 1M HCl with different concentrations of mixed ligands (glu.and arg.)and their ternary metal complexes at 303K for 7 h.

**Table 1S** MIP (molecular ion peak) values from mass spectra of the prepared complexes

| Complex                                                            | MIP without outer sphere<br>water        | Molecular Mass |
|--------------------------------------------------------------------|------------------------------------------|----------------|
| [Co(glu)(arg)(H <sub>2</sub> O) <sub>2</sub> ].H <sub>2</sub> O    | 388.03 (Mt.Wt.-2H <sub>2</sub> O=389.26) | 425.26         |
| [Ni(glu)(arg)(H <sub>2</sub> O) <sub>2</sub> ].0.5H <sub>2</sub> O | 386.71 (Mt.Wt.-2H <sub>2</sub> O=389.03) | 425.03         |
| [Cu(glu)((arg)].H <sub>2</sub> O                                   | 385.23 (Mt.Wt.-H <sub>2</sub> O=384.87)  | 402.87         |
| [Zn(glu)(arg)(H <sub>2</sub> O) <sub>2</sub> ].0.5H <sub>2</sub> O | 402.67 (Mt.Wt.-2H <sub>2</sub> O=404.71) | 440.71         |

**Table 2S.** Cytotoxicity evaluation of the ligands and their complexes

| Complexes                                                         | IC <sub>50</sub> , µg(HePG2) |
|-------------------------------------------------------------------|------------------------------|
| [Glutamic]                                                        | 43.7                         |
| [L-Arginine]                                                      | >50                          |
| [Co.Glu.Arg.(H <sub>2</sub> O) <sub>2</sub> ].0.5H <sub>2</sub> O | 15.4                         |
| [Ni.Glu.Arg.(H <sub>2</sub> O) <sub>2</sub> ].0.5H <sub>2</sub> O | 12.1                         |
| [Cu.Glu.Arg.].H <sub>2</sub> O                                    | 8.6                          |
| [Zn.Glu.Arg.(H <sub>2</sub> O) <sub>2</sub> ].H <sub>2</sub> O    | 11.8                         |
| Doxorubicin HCl                                                   | 1.2                          |
